## RESEARCH ARTICLE

# COVID-19 laboratory preparedness and response in the Americas Region: Lessons learned

Juliana Almeida Leite , Lionel Gresh , Andrea Vicari, Jean Marc Gabastou, Enrique Perez , Sylvain Aldighieri, SARINET laboratories Network<sup>¶</sup>, Jairo Mendez-Rico\*

Health Emergencies Department, Pan American Health Organization, Washington, District of Columbia, United States of America

<sup>¶</sup> Membership of the SARINET laboratories Network is Provided in the Acknowledgments.

\* [ricoj@paho.org](mailto:ricoj@paho.org)

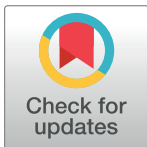

## OPEN ACCESS

**Citation:** Leite JA, Gresh L, Vicari A, Gabastou JM, Perez E, Aldighieri S, et al. (2021) COVID-19 laboratory preparedness and response in the Americas Region: Lessons learned. PLoS ONE 16(6): e0253334. <https://doi.org/10.1371/journal.pone.0253334>

**Editor:** Martin Chtolongo Simuunza, University of Zambia, ZAMBIA

**Received:** November 16, 2020

**Accepted:** April 5, 2021

**Published:** June 29, 2021

**Copyright:** © 2021 Leite et al. This is an open access article distributed under the terms of the [Creative Commons Attribution License](https://creativecommons.org/licenses/by/4.0/), which permits unrestricted use, distribution, and reproduction in any medium, provided the original author and source are credited.

**Data Availability Statement:** All relevant data are within the paper.

**Funding:** The provision of positive controls for SARS-CoV-2 RT-PCR was supported by the European Virus Archive Global (EVA-GLOBAL) project that has received funding from the European Union's Horizon 2020 research and innovation program under grant agreement No 871029.

**Competing interests:** The authors have declared that no competing interests exist.

## Abstract

By the time the etiologic agent of the COVID-19 was identified as a novel coronavirus, no country in the Americas Region had laboratory capacity for detecting this new virus. A strategic multilevel approach with specific reagent purchase and delivery, regional trainings, in-country missions, and the provision of technical support was established for timely preparedness of national reference laboratories for SARS-CoV-2 detection. All countries should be prepared to timely detect any potential pandemic emerging agent. The rapid SARS-CoV-2 molecular detection implementation throughout the Americas showed the importance of an efficient and coordinated laboratory response for preparedness. Here we present how in 25 days the Americas Region went from no SARS-CoV-2 diagnostic capacity, to molecular detection fully implemented in 28 Member States, under the coordinated strategy of the Pan American Health Organization and collaborative work at regional and country level with national authorities and public health laboratories.

## Introduction

On 31 December 2019, China informed the World Health Organization (WHO) about a cluster of unusual severe pneumonia cases [1]. By early January, Chinese authorities officially announced a novel coronavirus as the etiologic agent responsible for this outbreak [2, 3]. First phylogenetic analysis indicated that this coronavirus was distinct from the severe acute respiratory syndrome (SARS-CoV) and Middle East respiratory syndrome (MERS-CoV) coronaviruses, being further classified within the same species as SARS-CoV and named SARS-CoV-2 by the International Committee on Taxonomy of Viruses (ICTV) [3, 4]. Simultaneously, WHO named the disease as COVID-19, for “coronavirus disease 2019” [5].

As the outbreak evolved with international spread, the disease clinical spectrum and its severity started to be elucidated. Additionally, the extent of human-to-human transmission in the community including healthcare facilities and the contribution of mild and asymptomatic were major concerns to be studied. Therefore, on 30 January 2020, the WHO declared COVID-19 outbreak a Public Health Emergency of International Concern (PHEIC) under

International Health Regulations (IHR) [6]. The Emergency Committee recommendations stated all countries should be prepared for active surveillance and early detection of COVID-19 [6, 7].

In this context, the Pan American Health Organization (PAHO), WHO Regional Office for the Americas, worked to timely support Member States in preparing and responding to COVID-19. To coordinate its activities, PAHO activated the Incident Management System, which included a laboratory response team to support implementation of SARS-CoV-2 detection according to countries' laboratory capacity. How the Americas Region went from no SARS-CoV-2 diagnostic capacity, to molecular detection fully implemented in 28 Member States in 25 days, under PAHO coordinated strategy and collaborative work at regional and country level with national authorities and public health laboratories is presented here.

## Materials and methods

### Existing laboratory capacity through WHO Global Influenza Surveillance and Response System

Countries in the Americas have been conducting influenza and other respiratory viruses' surveillance as part of the WHO Global Influenza Surveillance and Response System (GISRS). Inside the influenza surveillance systems, the laboratory diagnosis is the only way to determine the specific aetiology of an Influenza-like-illness (ILI) or Severe Acute Respiratory Infection (SARI) case. Therefore, PAHO focused upon building capacity for virologic surveillance and improving the frequency, quantity and quality of the data that are shared through the GISRS network where the National Influenza Centres (NICs) and National Reference Laboratories serve as technical reference point surveillance within the country for influenza and other respiratory viruses.

Among the GISRS laboratory network in the Americas, 29 PAHO Member States and territories had molecular platforms, with real-time equipment for molecular detection of influenza and other respiratory viruses detection. Beside, PAHO has been working in strengthening existing or establishing new molecular platforms for emerging pathogens detection, through implementation of updated molecular diagnostic protocols, through provision of regional molecular diagnostic trainings, joint trainings with WHO Collaborating Centres, in-country missions for laboratory assessment, provision of reagents and supplies for molecular diagnostic sustainability. With all of this, the SARS-CoV-2 molecular implementation was mainly based on the NICs and national public health laboratories with a track record in the influenza laboratory surveillance.

### Laboratory preparedness for SARS-CoV-2 detection

On 20 January 2020, one day prior to the detection of the first case of COVID-19 in the Americas, laboratory technical guidance on SARS-CoV-2 detection was included in PAHO's Epidemiological Update, published in English and Spanish [8]. This initial guidance was expanded into a specific document on "Laboratory Diagnosis of Novel Coronavirus (nCoV) infection" published first on 21 January, being routinely updated [9]. Additionally, "Interim laboratory biosafety guidelines for the handling and transport of samples associated with the novel coronavirus 2019" were released 28 January 2020. All these documents were published in English and Spanish and disseminated to Member States through IHR national focal points.

The strategy for implementation of SARS-CoV-2 detection involved a multilevel approach with specific reagent purchase and delivery, regional trainings, in-country missions, and the provision of continued technical support (Fig 1).

Laboratory response initiated with promptly synthesizing of primers and probes for SARS-CoV-2 screening targeting the envelope (E) gene and confirmation targeting the RNA-dependent RNA polymerase (RdRp) gene based on the protocol released and published by the Charité –Universitätsmedizin Berlin Institute of Virology, Germany [10]. Positive controls were obtained from MOLBIOL (USA) and kindly donated through the European Virus Archive—Global (EVAg). Also, commercially available kits with primers, probe and control based on the same protocol (LightMix® Modular SARS and Wuhan CoV E-gene and Light-Mix® Modular Wuhan CoV RdRP-gene, TIB MOLBIOL) were obtained. Reagents and critical material were procured by PAHO through regular acquisition mechanisms based on the RT-PCR reference protocol and from reliable providers. To ensure a harmonized process, most of the material was delivered at PAHO Head Quarters for a strategic stockpile that was distributed directly to laboratories or thorough PAHO Country Offices using certified couriers with cold-chain granted when needed. Additional reagents were provided to training host laboratory (InDRE in Mexico, and Fiocruz in Brazil) and used during regional trainings.

SARS-CoV-2 molecular diagnostic implementation in the Americas Region started 30 January 2020 with in-country missions of PAHO virology experts to Brazil and Suriname, being followed by sub regional trainings and additional missions for providing capacitation and assistance to participants and laboratory staff on SARS-CoV-2 molecular diagnostic implementation and reagent delivery. Additional technical support was provided to the countries either by discussion of questions and challenges raised during the regional trainings as well as through individual meetings and troubleshooting sections requested either by the Ministries of Health or the National Laboratories.

## Results and discussion

The first sub-regional laboratory training was held in Brazil on 6–7 February 2020 for eight South American countries (Argentina, Bolivia, Chile, Colombia, Ecuador, Paraguay, Peru and Uruguay) and Panama. The second in Mexico on 12–13 February for six Central American countries (Belize, Costa Rica, El Salvador, Honduras, Guatemala, and Nicaragua), Cuba, Dominican Republic, and Mexico. All participating countries were trained on Charité screening and confirmatory assays and received reagents for implementation in their respective countries, that included primers, probes and positive controls.

Parallel in-country missions for SARS-CoV-2 molecular diagnostic implementation as well as reagent delivery were conducted in Venezuela, Haiti, Barbados, Jamaica, Dominica, and Guyana (Fig 1). Likewise, on 05 February 2020 reagents for Charité protocol were shipped to the Medical Microbiology Laboratory at Caribbean Public Health Agency (CARPHA), which serves as NIC for the Caribbean Subregion. In-country missions focused diagnostic implementation at the national laboratories with on-site PAHO training and guidance, while individual countries implementation was held by skilled personal from the laboratory through remote PAHO assistance.

Concurrently, PAHO provided molecular diagnostic reagents and critical material, as laboratory supplies, enzymes and extraction kits, to ensure the continuity of the COVID-19 laboratory surveillance. In all laboratories, implementation was successful and expected results were obtained for positive and negative controls, generating reliable results.

As anticipated, some challenges and limitations were encountered during the course of implementation of the SARS-CoV-2 molecular detection in the region. Some countries do not have a fast procurement system and availability of certain reagents including oligonucleotide synthesis in-country, so PAHO worked with the stock-pile strategy for providing auxiliary reagents and supplies. Likewise, flight restrictions impacted the in-country missions, so meetings and support activities successfully migrated to virtual platform. As always, customs

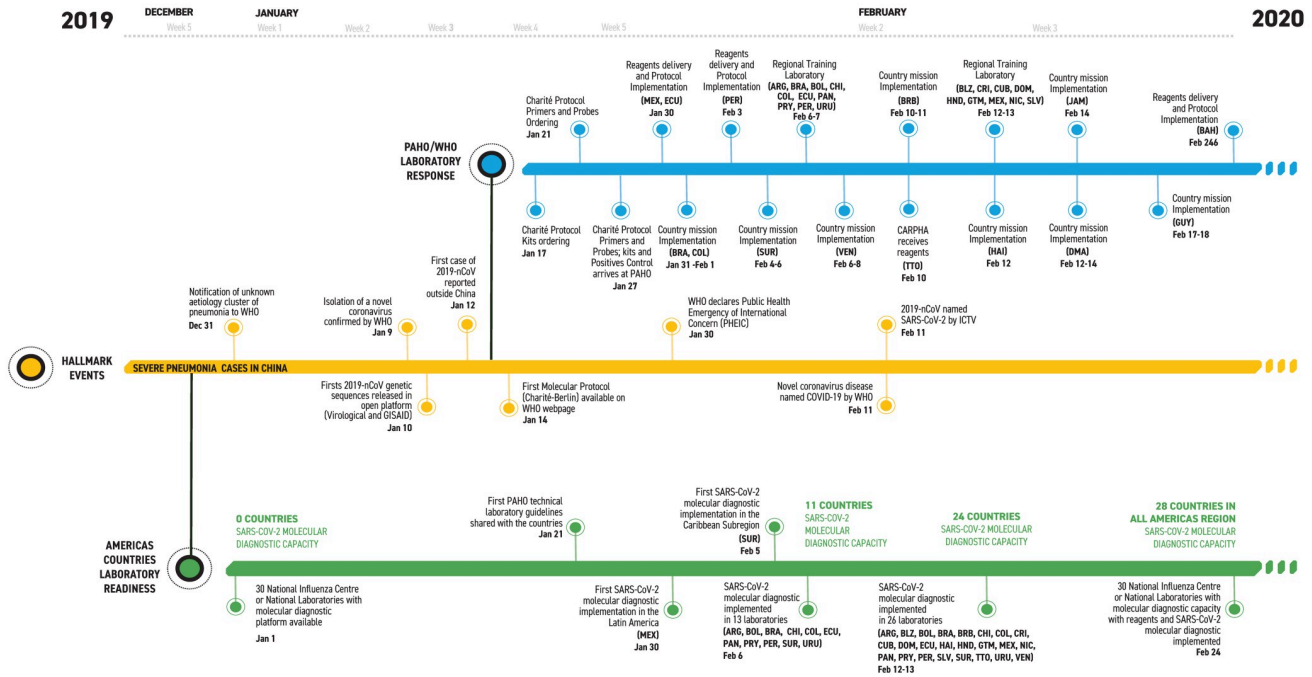

**Fig 1. Timeline of the laboratory preparedness and response in the Americas Region to the COVID-19 outbreak, 31 December 2019 to 24 February 2020.** Country codes: ARG-Argentina, BHS-Bahamas, BLZ-Belize, BOL-Bolivia, BRA-Brazil, BRB-Barbados, CHL-Chile, COL-Colombia, CRI-Costa Rica, CUB-Cuba, DMA-Dominica, DOM-Dominican Republic, ECU-Ecuador, GUY-Guyana, HAI-Haiti, HND-Honduras, GTM-Guatemala, JAM-Jamaica, MEX-Mexico, NIC-Nicaragua, PAN-Panama, PRY-Paraguay, PER-Peru, SLV-El Salvador, SUR-Suriname, TTO-Trinidad & Tobago, URU-Uruguay, VEN-Venezuela; CARPHA: Caribbean Public Health Agency. Data for Canada, French Guiana and United States not included in the timeline.

<https://doi.org/10.1371/journal.pone.0253334.g001>

clearance process has generated delays on timely material delivery to the National Laboratories. PAHO worked supporting the countries Ministry of Health for expediting clearance. Optimizing customs process which involve reagents and supplies for responding to a health emergency, with no affecting of fiscal functions or customs tariff, would enable a more effective and timely response to the health emergency. Prioritization of customs clearance for these materials should be considered in the countries' health contingency plans.

By the time of the first notification of the unknown aetiology cluster of pneumonia in Wuhan to WHO and the release of the first SARS-CoV-2 molecular detection protocol, the Americas Region had no SARS-CoV-2 diagnostic capacity. By February 12, less than 15 days after declaration of COVID-19 PHEIC, 75% (26/30) of the laboratories in the Region had successfully implemented the SARS-CoV-2 detection.

By February 24, 28 of the 29 countries had the SARS-CoV-2 molecular diagnostic timely implemented with support of the Laboratory Response Team of the PAHO Health Emergency Department under coordination of the COVID-19 Incident Manager. In terms of regional capacity, it is important to mention that the United States of America and Canada timely developed and implemented their own in-house protocols for SARS-CoV-2 molecular detection. French Guiana timely started diagnostic based on Charité and Hong Kong protocols through the Institute Pasteur International Network. Thus, the full implementation of SARS-CoV-2 molecular detection in all the laboratory network in the Americas was achieved 25 days after the COVID-19 PHEIC declaration and 16 days before the WHO declaration of COVID-19 Pandemic on March 11 (Table 1).

Table 1. COVID-19 national laboratory readiness in the Americas Region, February 2020.

| Country            | COVID-19 Diagnostic Laboratory                                                                     | National Influenza Center | Currently testing for COVID-19 | Staff trained for COVID-19 PCR | Has COVID-19 Reagents | COVID-19 protocol in use  | COVID-19 reagent in use <sup>a,b</sup>                                                                  | Has access to ancillary reagents <sup>c</sup> |
|--------------------|----------------------------------------------------------------------------------------------------|---------------------------|--------------------------------|--------------------------------|-----------------------|---------------------------|---------------------------------------------------------------------------------------------------------|-----------------------------------------------|
| Argentina          | Instituto Nacional de Enfermedades Infecciosas -ANLIS C.G.Malbran                                  | Yes                       | Yes                            | Yes                            | Yes                   | Charité - Berlin Protocol | Primers, Probes and positive controls for E gene and RdRP gene and TIB BioMol kits                      | Yes                                           |
| Brazil             | Fundação Oswaldo Cruz (FIOCRUZ)                                                                    | Yes                       | Yes                            | Yes                            | Yes                   | Charité - Berlin Protocol | Primers, Probes and positive controls for E gene and RdRP gene and Kits provided by PAHO and by BRA MoH | Yes                                           |
|                    | Instituto Adolfo Lutz (IAL)                                                                        | Yes                       | Yes                            | Yes                            | Yes                   | Charité - Berlin Protocol | Primers, Probes and positive controls for E gene and RdRP gene and Kits provided by PAHO and by BRA MoH | Yes                                           |
|                    | Instituto Evandro Chagas (IEC)                                                                     | Yes                       | Yes                            | Yes                            | Yes                   | Charité - Berlin Protocol | Primers, Probes and positive controls for E gene and RdRP gene and Kits provided by PAHO and by BRA MoH | Yes                                           |
| Bahamas            | Ministry of Health Reference Laboratory                                                            | No                        | Yes                            | Yes                            | Yes                   | Charité - Berlin Protocol | TIB Bio Mol Kit for E gene and RdRP gene provided by PAHO                                               | Yes                                           |
| Barbados           | Best-Dos Santos Public Health Laboratory                                                           | No                        | Yes                            | Yes                            | Yes                   | Charité - Berlin Protocol | TIB Bio Mol Kit for E gene and RdRP gene provided by PAHO                                               | Yes                                           |
| Belize             | Central Medical Laboratory                                                                         | No                        | Yes                            | Yes                            | Yes                   | Charité - Berlin Protocol | TIB Bio Mol Kit for E gene and RdRP gene provided by PAHO                                               | Yes                                           |
| Bolivia            | Centro Nacional de Enfermedades Tropicales (CENETROP)                                              | Yes                       | Yes                            | Yes                            | Yes                   | Charité - Berlin Protocol | TIB Bio Mol Kit for E gene and RdRP gene provided by PAHO                                               | Yes                                           |
| Canada             | National Microbiology Laboratory Health Canada Canadian Science Center for Human and Animal Health | Yes                       | Yes                            | Yes                            | Yes                   | <i>in house</i>           | -                                                                                                       | Yes                                           |
| Chile <sup>d</sup> | Instituto de Salud Pública de Chile (ISPC)                                                         | Yes                       | Yes                            | Yes                            | Yes                   | Charité - Berlin Protocol | TIB Bio Mol Kits provided by PAHO; Primers, and Probes from ISPC and positive controls provided by PAHO | Yes                                           |
| Colombia           | Instituto Nacional de Salud (INS)                                                                  | Yes                       | Yes                            | Yes                            | Yes                   | Charité - Berlin Protocol | Primers, Probes and positive controls for E gene and RdRP gene provided by PAHO                         | Yes                                           |
| Costa Rica         | Instituto Costarricense de Investigación y Enseñanza en Nutrición y Salud (INCIENSA)               | Yes                       | Yes                            | Yes                            | Yes                   | Charité - Berlin Protocol | TIB Bio Mol Kit for E gene and RdRP gene provided by PAHO                                               | Yes                                           |
| Cuba               | Instituto de Medicina Tropical "Pedro Kouri" (IPK)                                                 | Yes                       | Yes                            | Yes                            | Yes                   | Charité - Berlin Protocol | TIB Bio Mol Kit for E gene and RdRP gene provided by PAHO                                               | Yes                                           |
| Dominica           | Princess Margaret Hospital Medical Laboratory                                                      | No                        | Yes                            | Yes                            | Yes                   | Charité - Berlin Protocol | TIB Bio Mol Kit for E gene and RdRP gene provided by PAHO                                               | Yes                                           |

(Continued)

Table 1. (Continued)

| Country            | COVID-19 Diagnostic Laboratory                                        | National Influenza Center | Currently testing for COVID-19 | Staff trained for COVID-19 PCR | Has COVID-19 Reagents | COVID-19 protocol in use                            | COVID-19 reagent in use <sup>a,b</sup>                                                              | Has access to ancillary reagents <sup>c</sup> |
|--------------------|-----------------------------------------------------------------------|---------------------------|--------------------------------|--------------------------------|-----------------------|-----------------------------------------------------|-----------------------------------------------------------------------------------------------------|-----------------------------------------------|
| Dominican Republic | Laboratorio Nacional de Salud Pública Dr. Defillo (LNSPDD)            | Yes                       | Yes                            | Yes                            | Yes                   | Charité - Berlin Protocol                           | TIB Bio Mol Kit for E gene and RdRP gene provided by PAHO                                           | Yes                                           |
| Ecuador            | Instituto Nacional de Investigación en Salud Pública (INISP)          | Yes                       | Yes                            | Yes                            | Yes                   | Charité - Berlin Protocol                           | TIB Bio Mol Kit for E gene and RdRP gene provided by PAHO                                           | Yes                                           |
| El Salvador        | Laboratorio Central Ministerio de Salud Publica "Dr Max Bloch"        | Yes                       | Yes                            | Yes                            | Yes                   | Charité - Berlin Protocol                           | TIB Bio Mol Kit for E gene and RdRP gene                                                            | Yes                                           |
| French Guiana      | Institut Pasteur de la Guyane                                         | Yes                       | Yes                            | Yes                            | Yes                   | Hong Kong University and Charité - Berlin protocols | -                                                                                                   | Yes                                           |
| Guatemala          | Laboratorio Nacional de Salud (LNS)                                   | Yes                       | Yes                            | Yes                            | Yes                   | Charité - Berlin Protocol                           | TIB Bio Mol Kit for E gene and RdRP gene provided by PAHO                                           | Yes                                           |
| Guyana             | National Public Health Reference Laboratory                           | No                        | Yes                            | Yes                            | Yes                   | Charité - Berlin Protocol                           | TIB Bio Mol Kit for E gene and RdRP gene provided by PAHO                                           | Yes                                           |
| Haiti              | Laboratoire National de Santé Publique (LNSP)                         | Yes                       | Yes                            | Yes                            | Yes                   | Charité - Berlin Protocol                           | TIB Bio Mol Kit for E gene and RdRP gene provided by PAHO                                           | Yes                                           |
| Honduras           | Laboratorio Nacional de Vigilancia de la Salud (LNV)                  | Yes                       | Yes                            | Yes                            | Yes                   | Charité - Berlin Protocol                           | TIB Bio Mol Kit for E gene and RdRP gene provided by PAHO                                           | Yes                                           |
| Jamaica            | Virology Laboratory University of the West Indies                     | Yes                       | Yes                            | Yes                            | Yes                   | Charité - Berlin Protocol                           | TIB Bio Mol Kit for E gene and RdRP gene provided by PAHO                                           | Yes                                           |
| Mexico             | Instituto de Diagnóstico y Referencia Epidemiológicos (InDRE)         | Yes                       | Yes                            | Yes                            | Yes                   | Charité - Berlin Protocol                           | Primers, Probes locally synthesized for E gene and RdRP gene and positive controls provided by PAHO | Yes                                           |
| Nicaragua          | Centro Nacional de Diagnóstico y Referencia (CNDR)                    | Yes                       | Yes                            | Yes                            | Yes                   | Charité - Berlin Protocol                           | TIB Bio Mol Kit for E gene and RdRP gene provided by PAHO                                           | Yes                                           |
| Panama             | Instituto Conmemorativo Gorgas de Estudios de la Salud (ICGES)        | Yes                       | Yes                            | Yes                            | Yes                   | Charité - Berlin Protocol                           | Primers, Probes locally synthesized for E gene and RdRP gene and positive controls provided by PAHO | Yes                                           |
| Paraguay           | Laboratorio Central de Salud Publica (LCSP)                           | Yes                       | Yes                            | Yes                            | Yes                   | Charité - Berlin Protocol                           | Primers, Probes locally synthesized for E gene and RdRP gene and positive controls provided by PAHO | Yes                                           |
| Peru               | Instituto Nacional de Salud (INS)                                     | Yes                       | Yes                            | Yes                            | Yes                   | Charité - Berlin Protocol                           | TIB Bio Mol Kit for E gene and RdRP gene                                                            | Yes                                           |
| Suriname           | Laboratorium Bureau Openbare Gezondheidszorg (BOG Central Laboratory) | No                        | Yes                            | Yes                            | Yes                   | Charité - Berlin Protocol                           | Primers, Probes and positive controls for E gene and RdRP gene provided by PAHO                     | Yes                                           |

(Continued)



Table 1. (Continued)

| Country                  | COVID-19 Diagnostic Laboratory                      | National Influenza Center | Currently testing for COVID-19 | Staff trained for COVID-19 PCR | Has COVID-19 Reagents | COVID-19 protocol in use  | COVID-19 reagent in use <sup>a,b</sup>                                                              | Has access to ancillary reagents <sup>c</sup> |
|--------------------------|-----------------------------------------------------|---------------------------|--------------------------------|--------------------------------|-----------------------|---------------------------|-----------------------------------------------------------------------------------------------------|-----------------------------------------------|
| Trinidad and Tobago      | Caribbean Public Health Agency (CARPHA)             | Yes                       | Yes                            | Yes                            | Yes                   | Charité - Berlin Protocol | Primers, Probes and positive controls for E gene and RdRP gene provided by PAHO                     | Yes                                           |
| Uruguay                  | Departamento de Laboratorio de Salud Publica (DLSP) | Yes                       | Yes                            | Yes                            | Yes                   | Charité - Berlin Protocol | Primers, Probes locally synthesized for E gene and RdRP gene and positive controls provided by PAHO | Yes                                           |
| United States of America | Respiratory Viruses Diagnostic Laboratory, US-CDC   | No                        | Yes                            | Yes                            | Yes                   | <i>CDC Protocol</i>       | -                                                                                                   | Yes                                           |
| Venezuela                | Instituto Nacional de Higiene Rafael Rangel (INHRR) | Yes                       | Yes                            | Yes                            | Yes                   | Charité - Berlin Protocol | TIB Bio Mol Kit for E gene and RdRP gene provided by PAHO                                           | Yes                                           |

<sup>a</sup>Primers, probes and positive controls for E gene and RdRP gene for up to 2,000 tests provided by PAHO.

<sup>b</sup>TIB BIOMOL kits for up to 96 tests provided by PAHO.

<sup>c</sup>Ancillary reagents for molecular diagnostic refers to reagents as enzymes and extraction kits for the sustainability of the implemented protocol in the countries, since these additional reagents demand was not predicted.

<sup>d</sup>At the moment of the submission, Chile was using other commercial protocol.

<https://doi.org/10.1371/journal.pone.0253334.t001>

As all countries should be prepared to detect the SARS-CoV-2, the rapid implementation of SARS-CoV-2 molecular detection showed the importance of an efficient and coordinated laboratory response for preparing the Americas Region for a pandemic (Table 2). The implementation of the SARS-CoV-2 detection throughout the Americas was possible due to four main points: (1) collaborative work at regional and country level, among PAHO/WHO, national authorities and national public health laboratories; (2) fast planning of the strategic response; (3) efficient logistic for procurement and distribution of necessary reagents, including strategic stockpile at PAHO headquarters; and (4) field missions for in-country and sub regional trainings. Importantly, regional efforts to strengthen the surveillance of influenza, other respiratory viruses, and emerging and re-emerging viruses in the past decade have laid the ground for timely and widespread implementation. The main limitation of the response at that moment was the lack of proficiency panels to independently verify performance of trained laboratories.

Table 2. Summary of main lessons learnt on laboratory response for preparing to a pandemic.

| Action                 | Lesson learnt                                                                                                                                                                                                                                                                                                                  |
|------------------------|--------------------------------------------------------------------------------------------------------------------------------------------------------------------------------------------------------------------------------------------------------------------------------------------------------------------------------|
| Planning               | Fast planning of a strategic response is essential for an efficient and timely laboratory readiness to respond to a public health event of international concern before it becomes a pandemic.                                                                                                                                 |
| Collaboration          | A collaborative work at regional and country level, among public health agencies, national authorities and national public health laboratories is critical for the laboratory's preparedness and appropriate response during the pandemic phase.                                                                               |
| Logistic               | Efficient logistic for obtaining and distribution of necessary reagents and critical material, including strategic stockpile made possible the readiness and timely implementation of molecular detection protocols in countries as well as the continuous support for maintenance of the testing sustainability in countries. |
| Missions and trainings | Field missions in-country and sub regional trainings were fundamental for expediting the laboratory preparedness and response.                                                                                                                                                                                                 |

<https://doi.org/10.1371/journal.pone.0253334.t002>

However, proficiency panels under WHO coordination were available in April 2020 and distributed in the Region to assess laboratory performance, with 94% (28/30) of the participating laboratories having 100% score.

Under the PAHO Incident Management System, there are currently three critical actions for the COVID-19 response in the Americas: (1) save lives by reorganizing health services, maintaining infection prevention and control and optimizing clinical management; (2) protect health care workers at work and in the community and (3) slow spread of COVID-19 by detecting and isolating cases, quarantining contacts and implementing social distancing and travel-related measures [11]. Epidemiologic and laboratorial surveillance is key for these actions. Therefore, laboratory readiness is an important pillar of this response. The COVID-19 pandemic impacted most of the countries world-wide, including the laboratories testing capacity with needs of reagents, trainings, human resource and all elements that are involved on laboratory readiness for a response. Thus, it is important to continue working together with the designated national laboratories for strengthening and maintenance of the laboratory's response capacity and sustainability of the SARS-CoV-2 detection.

## Conclusion

Laboratory readiness is a key tenet for rapid response to an emerging disease with potential to become a pandemic. Fast planning of a strategic response was essential for a timely laboratory preparedness. Collaboration at regional and country level, among public health agencies, national authorities and national public health laboratories is critical for the laboratory's preparedness and appropriate response during the pandemic phase. Efficient logistic for obtaining and distribution of necessary reagents and critical material, including strategic stockpile made possible the readiness and timely implementation of SARS-CoV-2 molecular detection protocols in the countries of the Americas Region as well as the continuous support for maintenance of the testing sustainability in countries. Field missions in-country and sub regional trainings were also fundamental for expediting the laboratory preparedness and response. PAHO continues to collaborate at regional and country level with national authorities and public health laboratories for leveraging laboratory readiness in the Americas Region for responding to the COVID-19 pandemic and any emerging viral diseases.

## Acknowledgments

We thank National Influenza Centres and other public health laboratories that participated in the trainings and implemented SARS-CoV-2 detection. We are also grateful for the support of the COVID-19 Incident Management System Team at PAHO headquarters and of personnel at PAHO/WHO Country Offices for the technical cooperation provided to the COVID-19 response. We also thank to Aleida Domingo for the shipping of the laboratory material and logistic support and to Natalia Toscano for the design of the graphic representation of the timeline. We are also grateful to the donors to PAHO/WHO for the sustained support. PAHO Incident Manager for COVID-19 response and coordination: Sylvain Aldighieri; PAHO technical team lead for COVID-19 response: Andrea Vicari; PAHO Biosecurity and Biosafety team lead for COVID-19 response: Jean-Marc Gabastou; PAHO Laboratory Response team lead for COVID-19 response: Jairo Mendez-Rico; PAHO laboratory response team for COVID-19: Juliana Almeida Leite, Lionel Gresh.

**SARINET laboratories network: PAHO:** Andrea Vicari, Juliana Leite (corresponding author on behalf of SARINET laboratories network: [leitejul@paho.org](mailto:leitejul@paho.org)), Jairo Mendez-Rico; **Argentina:** Elsa Baumeister, Andrea Pontoriero—Instituto Nacional de Enfermedades Infecciosas—ANLIS C.G.Malbran; **Bahamas:** Indira Martin, Shanario Whitfield, Keith McConnell



—Ministry of Health Reference Laboratory; **Barbados:** Songee Beckles, Kasandra Forde—Best-Dos Santos Public Health Laboratory; **Belize:** Juvencio Chan, Aldo Sosa—Central Medical Laboratory, **Bolivia:** Roxana Loayza—Centro Nacional de Enfermedades Tropicales (CEN-ETROP); **Brazil:** Marilda Mendonça Siqueira, Fernando Motta—Fundação Oswaldo Cruz (FIOCRUZ), Terezinha Maria de Paiva, Katia Corrêa de Oliveira Santos—Instituto Adolfo Lutz (IAL); Mirlaide Cordeiro dos Santos, Luana Soares Barbagelata—Instituto Evandro Chagas (IEC); **Chile:** Rodrigo Fasce, Patricia Bustos—Instituto de Salud Pública de Chile (ISPC); **Colombia:** Juliana Barbosa Ramirez; Luz Dary Rodriguez—Instituto Nacional de Salud (INS); **Costa Rica:** Hebleen Brenes, Claudio Soto-Garita—Instituto Costarricense de Investigación y Enseñanza en Nutrición y Salud (INCIENSA); **Cuba:** Guadalupe Guzman, Odalys Valdés Ramírez—Instituto de Medicina Tropical "Pedro Kouri" (IPK); **Dominica:** Catherina Jem-mott, Eric Carbon—Princess Margaret Hospital Medical Laboratory; **Dominican Republic:** Nurys de Castro, Melvi Pérez—Laboratorio Nacional de Salud Pública Dr. Defillo (LNSPDD); **Ecuador:** Alfredo Bruno Caicedo, Domenica Joseth de Mora Coloma—Instituto Nacional de Investigación en Salud Pública (INISP); **El Salvador:** Monica Barahona, Ruth Vasquez—Laboratorio Central Ministerio de Salud Pública "Dr Max Bloch"; **Guatemala:** Miriam Barrera, Andrea Lopez—Laboratorio Nacional de Salud (LNS); **Guyana:** Cyril Giddings, Shemeeza Sonaram Ally—National Public Health Reference Laboratory; **Haiti:** Jacques Boncy, Ito Journal—Laboratoire National de Santé Publique (LNSP); **Honduras:** Dina Castro, Rudvelinda Rivera—Laboratorio Nacional de Vigilancia de la Salud (LNV); **Jamaica:** Monica Smikle, Michelle Brown—Virology Laboratory, University of the West Indies; **Mexico:** Irma Lopez Martinez; Gisela Barrera—Instituto de Diagnóstico y Referencia Epidemiológicos (InDRE); **Nicaragua:** Angel Balmaseda Hechavarria, Roger Armando López—Centro Nacional de Diagnóstico y Referencia (CNDR); **Panama:** Danilo Franco, Juan Miguel Pascalle—Instituto Conmemorativo Gorgas de Estudios de la Salud (ICGES); **Paraguay:** Cynthia Vazquez, Maria Jose Ortega—Laboratorio Central de Salud Pública (LCSP); **Peru:** Ronnie Gavilan, Maribel Huar-inga—Instituto Nacional de Salud (INS); **Suriname:** Merrill Wongsokarijo—Laboratorium Bureau Openbare Gezondheidszorg (BOG Central Laboratoy); **Trinidad & Tobago:** Gabriel Gonzales, Lisa Indar—Caribbean Public Health Agency (CARPHA); **Uruguay:** Hector Chipar-elli, Natalia Goñi—Departamento de Laboratorio de Salud Pública (DLSP); **Venezuela:** Lieska Rodriguez, Victor Alarcón, Pierina D'Angelo—Instituto Nacional de Higiene Rafael Rangel (INHRR).

## Author Contributions

**Conceptualization:** Juliana Almeida Leite, Lionel Gresh, Andrea Vicari, Jean Marc Gabastou, Enrique Perez, Sylvain Aldighieri, Jairo Mendez-Rico.

**Methodology:** Juliana Almeida Leite, Lionel Gresh, Andrea Vicari, Jean Marc Gabastou, Enrique Perez, Sylvain Aldighieri, Jairo Mendez-Rico.

**Writing – original draft:** Juliana Almeida Leite, Jairo Mendez-Rico.

**Writing – review & editing:** Juliana Almeida Leite, Lionel Gresh, Andrea Vicari, Jean Marc Gabastou, Enrique Perez, Sylvain Aldighieri, Jairo Mendez-Rico.

## References

1. World Health Organization. Emergencies preparedness, response: Pneumonia of unknown cause—China. 2020 Jan 5. Available from: <https://www.who.int/csr/don/05-january-2020-pneumonia-of-unkown-cause-china/en/>

2. Virological. Novel 2019 Coronavirus genome. 2020 Jan 10. [cited 2020 Mar 19]. Available from: <http://virological.org/t/novel-2019-coronavirus-genome/319>
3. Global Initiative on Sharing All Influenza Data. EpiCoV (SARS-CoV2). 2020 Jan 12. [cited 2020 Mar 19]. Available from: <https://platform.gisaid.org>
4. Gorbalenya AE, Baker SC, Baric RS, de Groot RJ, Drosten C, Gulyaeva AA, et al. Severe acute respiratory syndrome-related coronavirus: The species and its viruses—a statement of the Coronavirus Study Group. *bioRxiv* 2020.
5. World Health Organization. Novel Coronavirus (2019-nCoV) Situation Report—22. 2020 Feb 11 2020. Available from: <https://www.who.int/docs/default-source/coronaviruse/situation-reports/20200211-sitrep-22-ncov.pdf>
6. World Health Organization. Statement on the second meeting of the International Health Regulations (2005) Emergency Committee regarding the outbreak of novel coronavirus (2019-nCoV). 2020 January 30. Available from: [https://www.who.int/news-room/detail/30-01-2020-statement-on-the-second-meeting-of-the-international-health-regulations-\(2005\)-emergency-committee-regarding-the-outbreak-of-novel-coronavirus-\(2019-ncov\)](https://www.who.int/news-room/detail/30-01-2020-statement-on-the-second-meeting-of-the-international-health-regulations-(2005)-emergency-committee-regarding-the-outbreak-of-novel-coronavirus-(2019-ncov))
7. World Health Organization. COVID-19 Strategic Preparedness and Response Plan—United Nations Country Teams and Partners Planning Guidelines. 2020 Feb 12. Available from: <https://www.who.int/publications-detail/strategic-preparedness-and-response-plan-for-the-new-coronavirus>
8. Pan American Health Organization / World Health Organization. Epidemiological Update: Novel coronavirus (nCoV) - 20 January 2020. 2020 Jan 20. Available from: <https://www.paho.org/en/documents/epidemiological-update-novel-coronavirus-ncov-20-january-2020>
9. Pan American Health Organization / World Health Organization. Laboratory Guidelines for the Detection and Diagnosis of COVID-19 Virus Infection. 2020 Jul 8. Available from: <https://www.paho.org/en/documents/laboratory-guidelines-detection-and-diagnosis-covid-19-virus-infection>
10. Corman V, Landt O, Molenkamp R, Meijer A, Chu D, Bleicker T, et al. Detection of 2019 novel coronavirus (2019-nCoV) by real-time RT-PCR. *Euro Surveill.* 2020; 25:2000045.
11. Pan American Health Organization. COVID-19. 2020 Mar 8. [cited 2020 Mar 19]. Available from: <https://covid19-evidence.paho.org>
